# Supplementary material for: Wnt/β-catenin activation and macrophage induction during liver cancer development following steatosis
Source: PubMed Central journal article supplement — Oncogene. 2017 Jul 3;36(43):6020–9. doi: 10.1038/onc.2017.207 (PMC5666317; doi:10.1038/onc.2017.207), 2017-07-03
Supplement: onc2017207x2.pdf [file onc2017207x2.pdf]

**A.**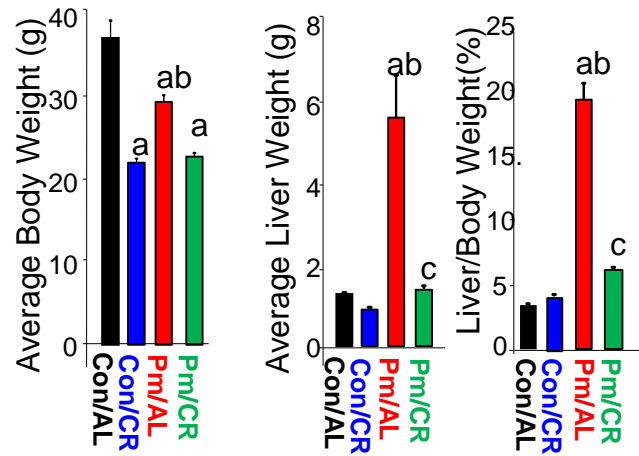**B.**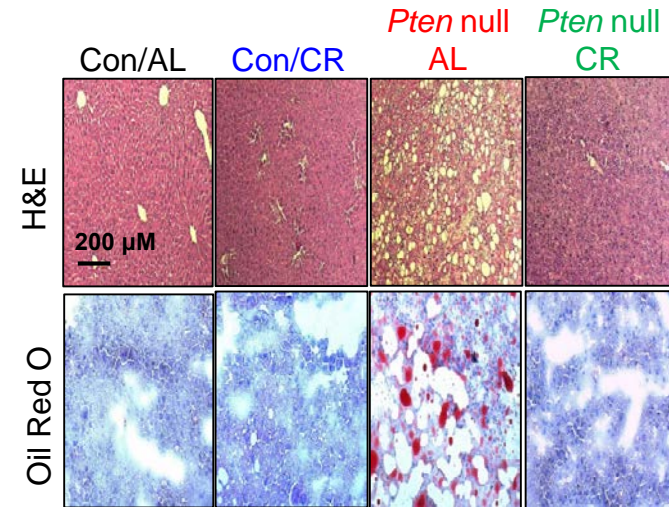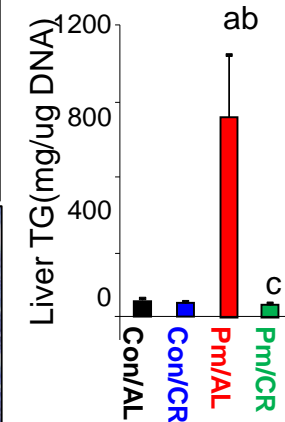**C.**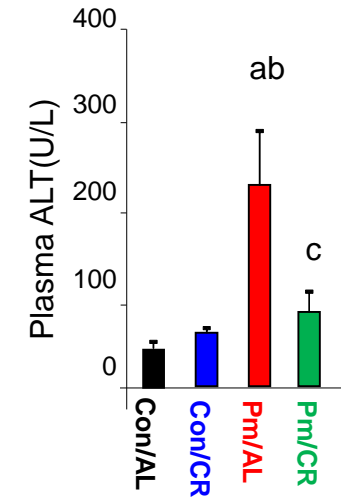

**Supplemental Figure 1. Characteristics of mice on Caloric Restricted.** Four months old mice were put on indicated diet for 7 months. **A.** Average body weight, liver weight and liver/body weight ratio at the end of the experiment. a, different from Con/AL; b, different from Con/CR, c, different from Pm/AL.  $P \leq 0.05$ .  $n=6-11$ . **B.** Left, liver tissue sections were collected from 13 month old control (Con) and *Pten* null (Pm) mice fed with *ad libitum* (AL) or Calorie restriction (CR) diet. H&E staining (top) and Oil Red O staining (bottom); Right, quantification of liver triglyceride (TG). **C.** Plasma ALT levels. All values are expressed as the mean  $\pm$  SEM.

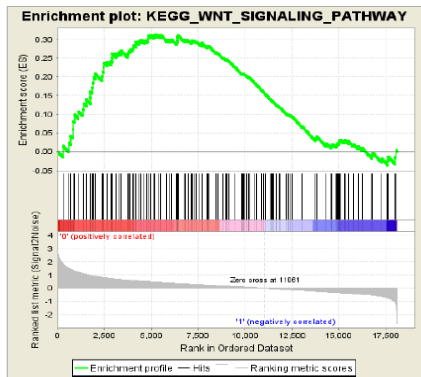

Fig 1: Enrichment plot: KEGG\_WNT\_SIGNALING\_PATHWAY  
Profile of the Running ES Score & Positions of GeneSet Members on the Rank Ordered List

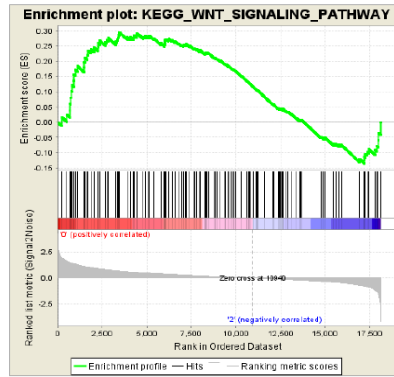

Fig 1: Enrichment plot: KEGG\_WNT\_SIGNALING\_PATHWAY  
Profile of the Running ES Score & Positions of GeneSet Members on the Rank Ordered List

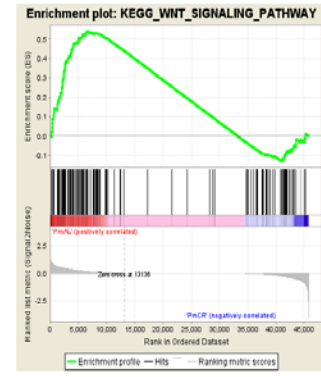

Fig 1: Enrichment plot: KEGG\_WNT\_SIGNALING\_PATHWAY  
Profile of the Running ES Score & Positions of GeneSet Members on the Rank Ordered List

Pm Con

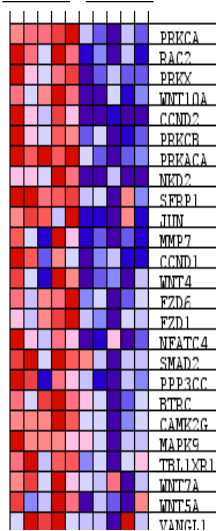

Pm Con

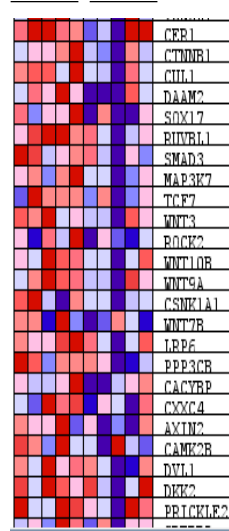

Pm Dm

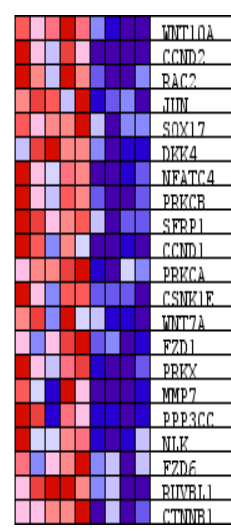

Pm Dm

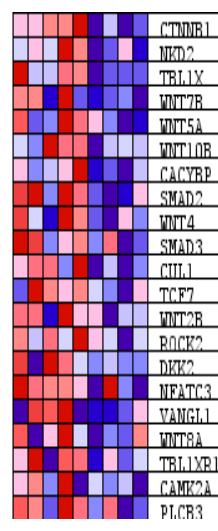

PmAL PmCR

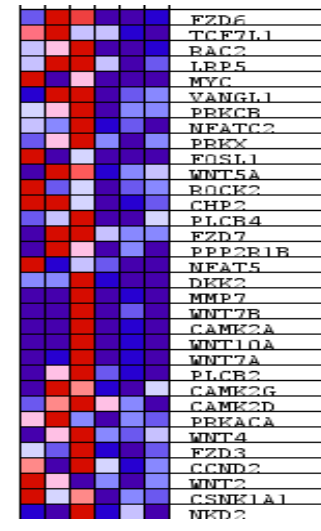

PmAL PmCR

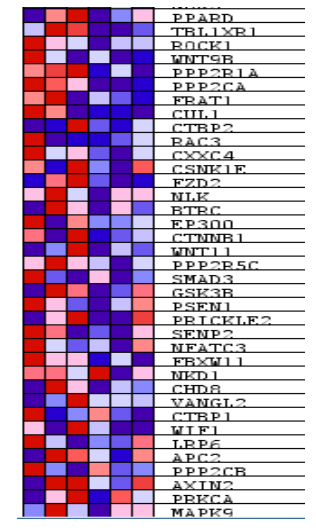

**Supplemental Figure 2. Gene Enrichment Score of KEGG Wnt Signaling Pathway in Differentially Expressed Genes in *Pten* null vs. Control or *Pten/Akt2* Double Deleted Livers. Left, GSE score and plot for genes that are differentially expressed between *Pten* null liver vs. control samples. Gene analysis performed using Microarray. Middle, GSE score and plot for genes that are differentially expressed between *Pten* null liver vs. *Pten/Akt2* double deleted livers samples. Gene analysis performed using Microarray. Right, GSE score and plot for genes that are differentially expressed between *Pten* null livers from ad lib (AL) fed or caloric restricted (CR) mice. Gene analysis performed using RNA-seq. 11-12 months old mice.**

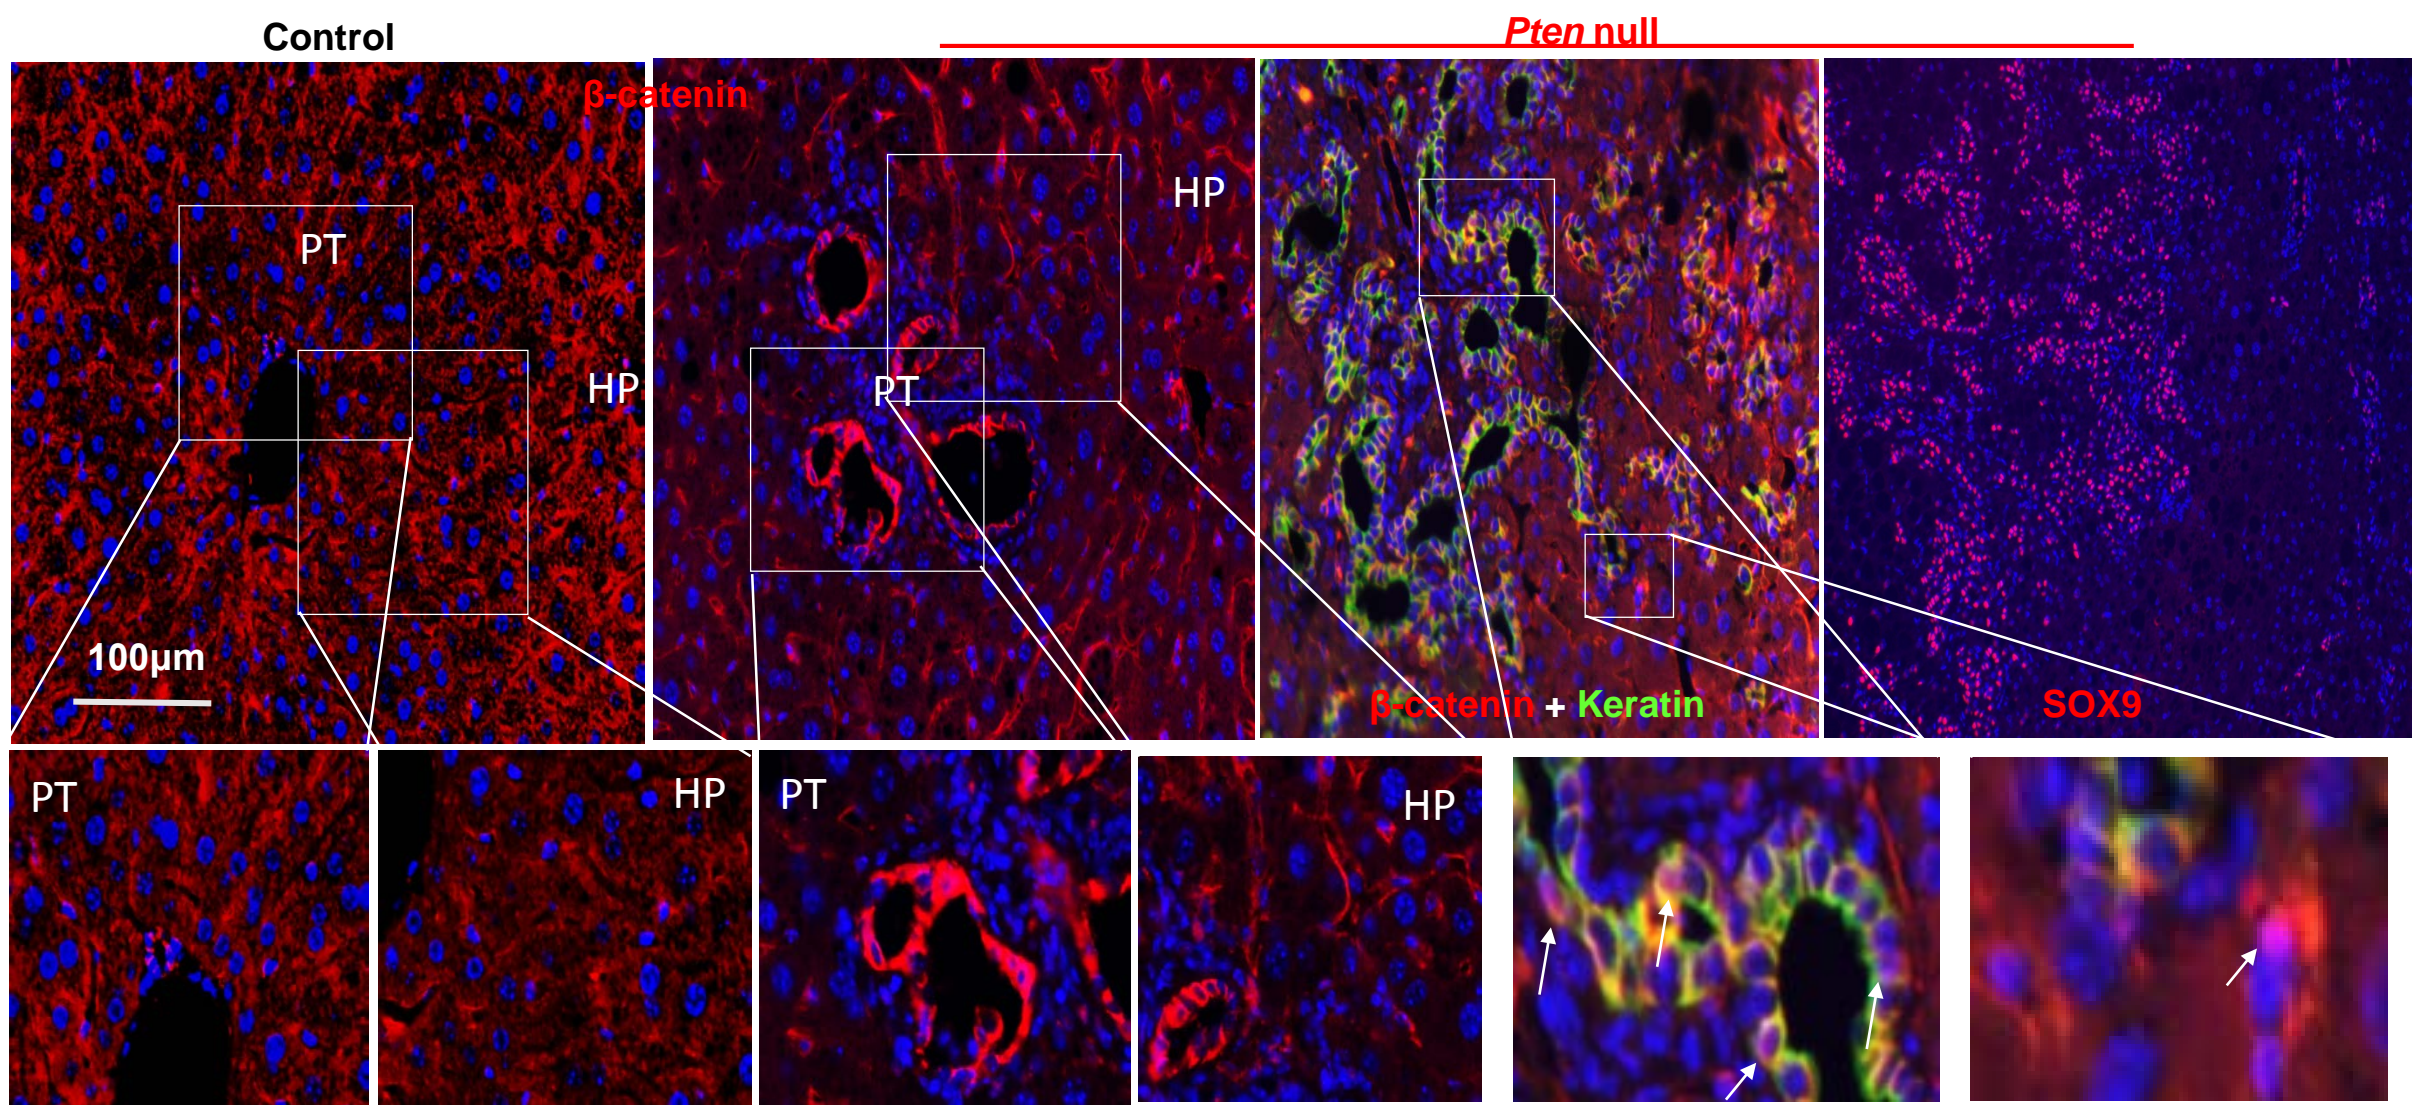

**Supplemental Figure 3.  $\beta$ -catenin staining pattern in control and *Pten* null livers.**  $\beta$ -catenin (red) and Dapi stained slides showing  $\beta$ -catenin staining primarily in hepatocytes in control liver sections and significantly intense  $\beta$ -catenin staining in ductal structure and portal triad in the *Pten* null livers sections. PT, portal triad; HP, hepatocytes. Top middle right panel,  $\beta$ -catenin (red) and keratin (green) staining to indicate  $\beta$ -catenin activation at the putative progenitor cell niche. Top right panel, staining for Sox9 (red) indicates tumors are positive for this progenitor marker. Arrows, nuclear  $\beta$ -catenin staining in periductal cells. 9 Months old mice.

**A.**

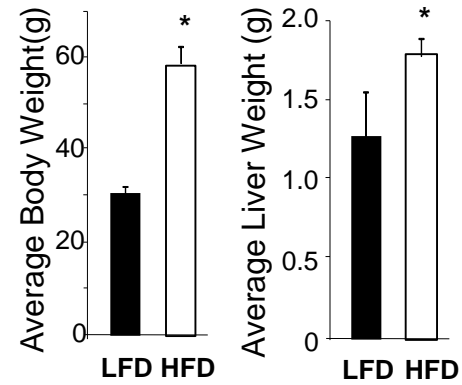

**B.**

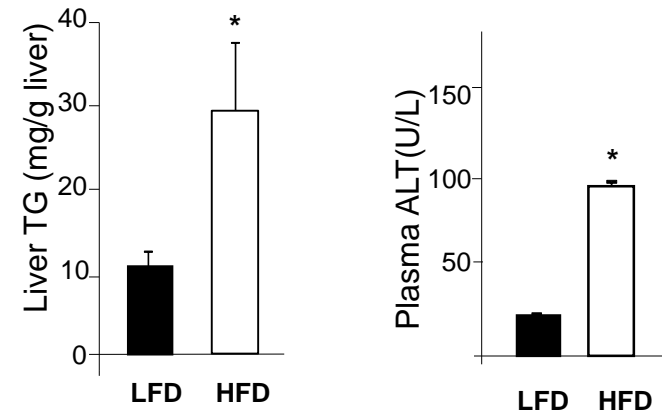

**Supplemental Figure 4. Characteristics of mice on High Fat Diet.** 3 months old mice were put on high fat diet (60kcal% fat diet) for 9 months. **A.** Final body and liver weight in LFD and HFD fed mice. **B.** Steatotic liver is developed in the HFD fed mice, leading to injury. Left, liver TG levels. Right, plasma ALT levels as indication of liver injury. n=6. All values are expressed as the mean  $\pm$  SEM.

**A.**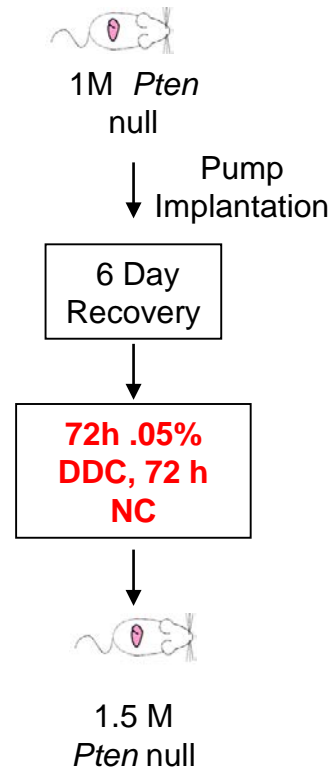**B.**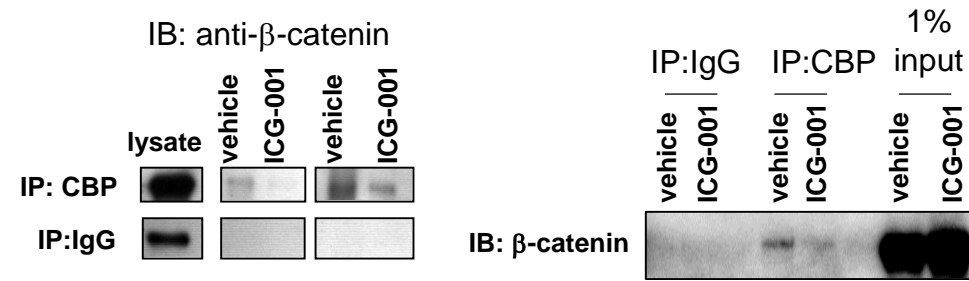**C.**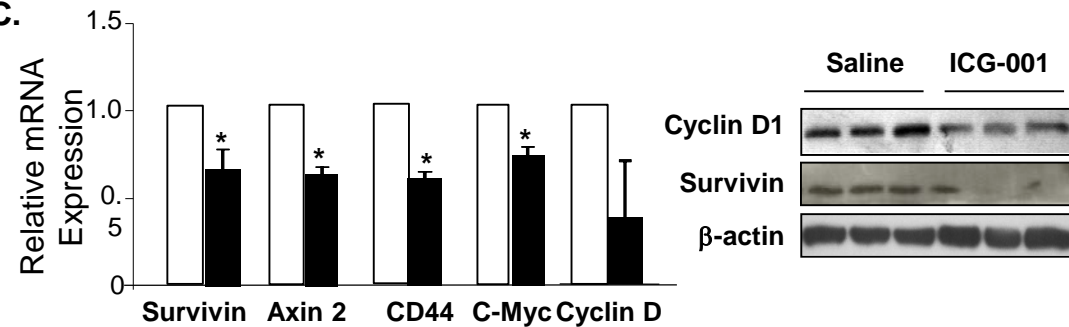

**Supplemental Figure 5. Inhibition of  $\beta$ -catenin activity with ICG-001.** **A.** Treatment regiment: 1 month old mice were implanted with Pump containing ICG-001. The mice were allowed recovery for 6 days before they were put on two rounds (72 hours each) of DDC containing diet (0.05% w/w). The mice were euthanized at the end of the treatment period for TIC analysis. **B.** Total liver (top panel) and nuclear (bottom) lysates from mice implanted with ICG-001 or saline pumps were immunoprecipitated with CBP and IgG antibodies and immunoblotted with  $\beta$ -catenin antibody. **C.** mRNA and protein expression of  $\beta$ -catenin regulated genes.  $n=3$ .  $n=3$ . \* Significantly different from vehicle controls (Con) at  $P \leq 0.05$ .

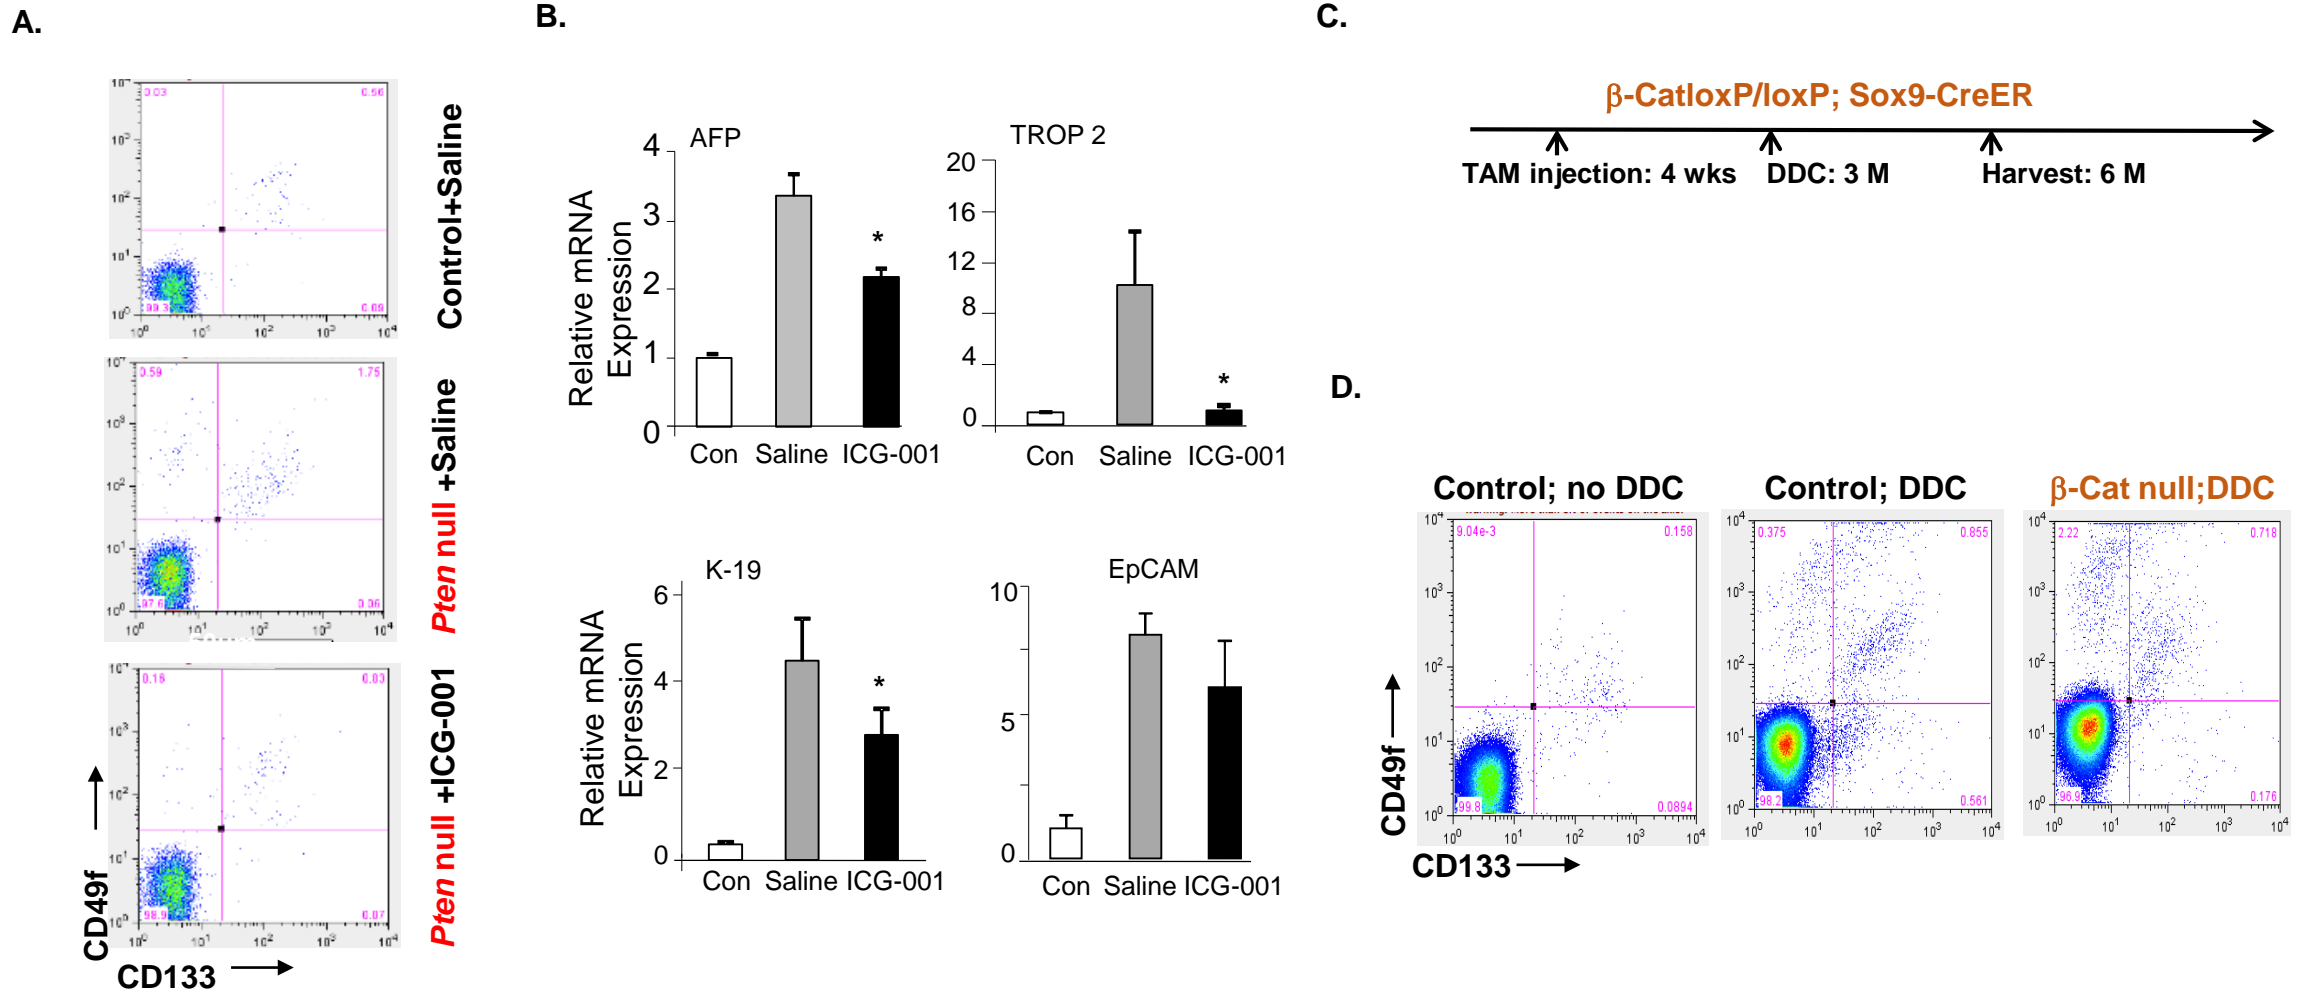

**Supplemental Figure 6. Inhibition of  $\beta$ -catenin activity in liver progenitor cells lead to reduced TIC and TIC proliferation.** **A.** Representative FACS plot of TICs in the control and *Pten* null mice treated with or without ICG-001 to block  $\beta$ -catenin activity. **B.** ICG-001 treatment reduces progenitor cell markers. AFP and keratin-19 (K-19) mRNA levels.  $n=3$ . **C.** Sox9-CreER;  $\beta$ -catenin+Tamoxifen ( $\beta$ -Cat null) and control mice were treated with DDC to induce TIC. TICs are quantified using CD133 and CD49f as cell surface markers.  $n=3$ . \* Significantly different from vehicle controls (Con) at  $P \leq 0.05$ . **C.** Protocol for induced  $\beta$ -catenin deletion and TIC enrichment. **D.** Representative FACS plot of TICs in the control and  $\beta$ -Cat null mice treated with DDC.

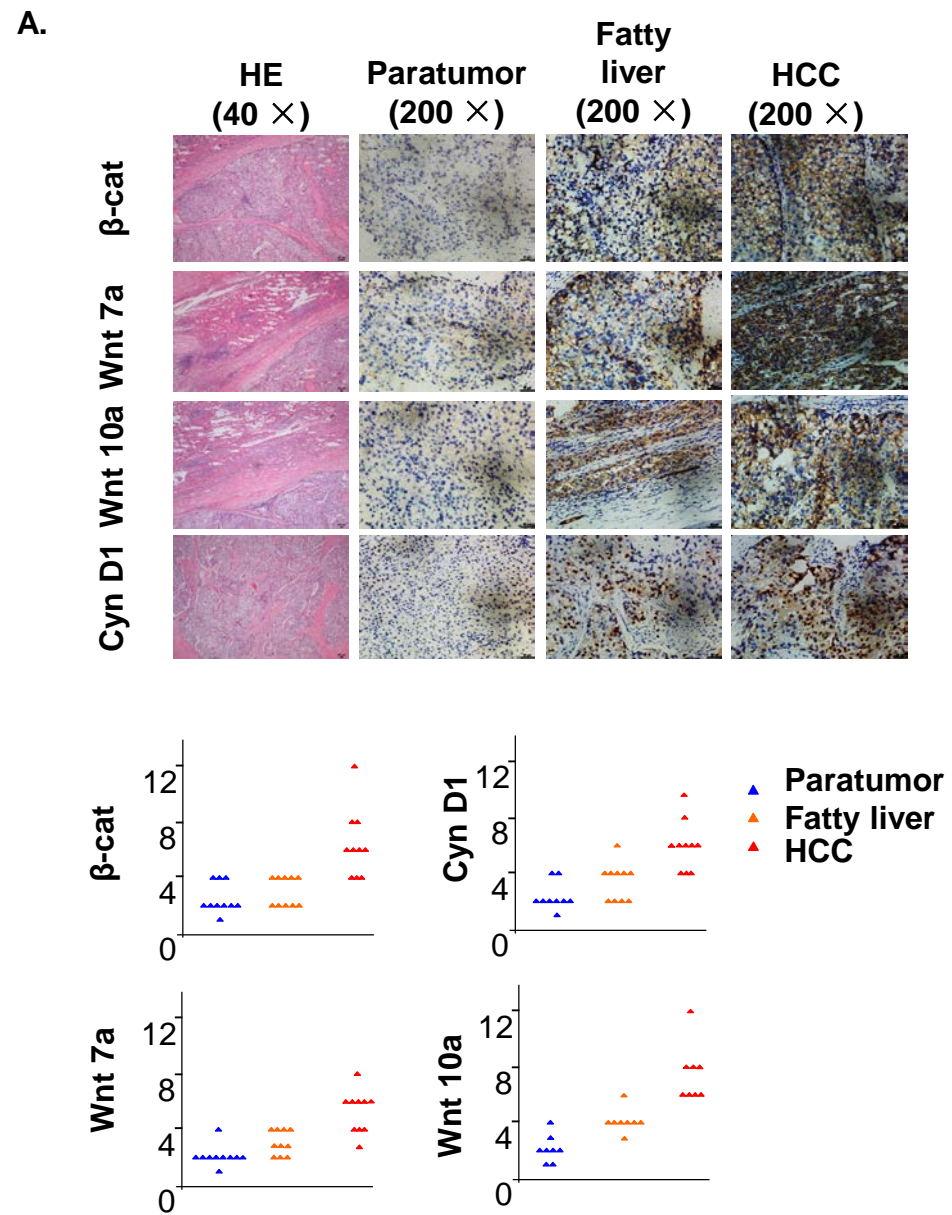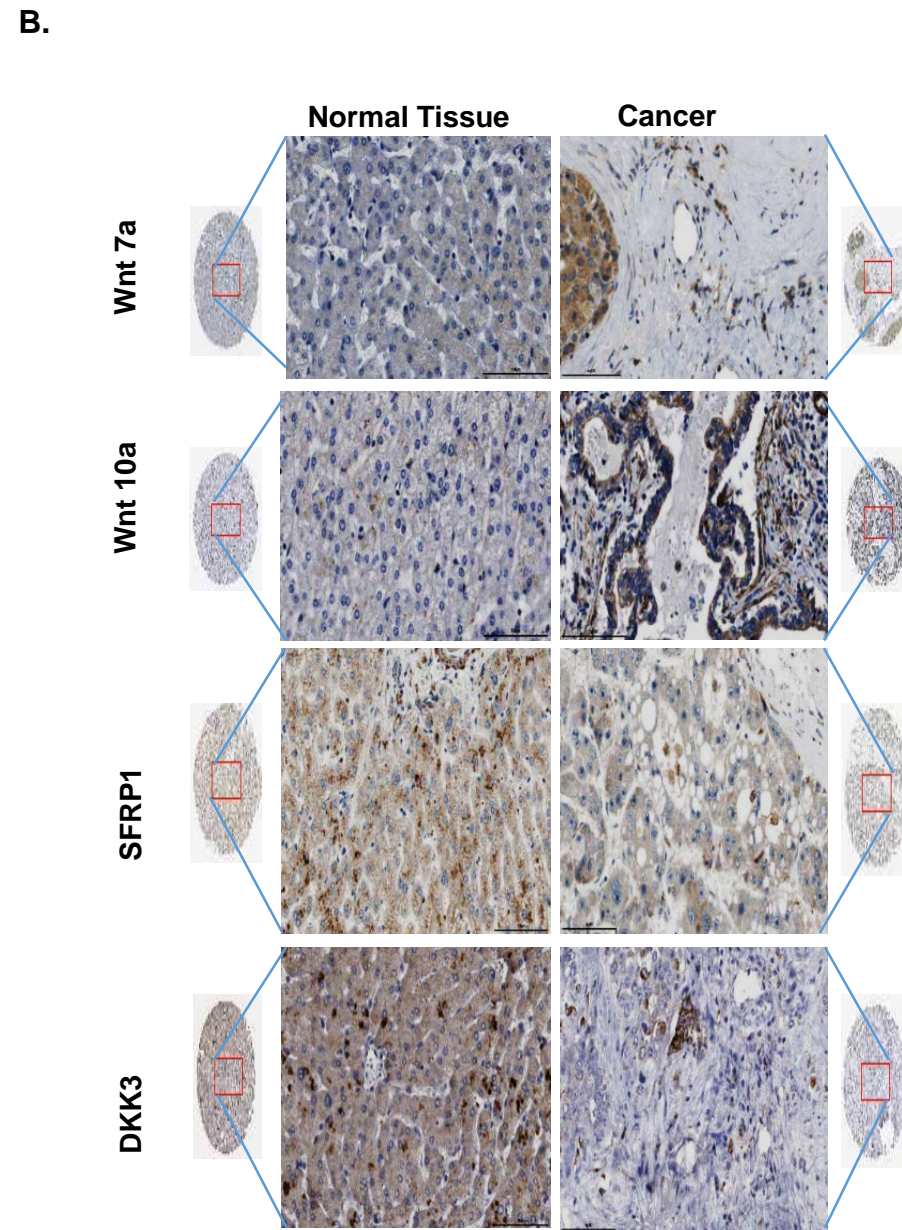

**Supplemental Figure 7. Analysis of Wnt signaling molecules in human tumor vs. non-tumor tissues. A.** Human liver sample specimen were stained with the indicated Wnt signaling molecules. Top, representative images; Bottom, histology scores for each patient sample. Each dot represent one patient sample. **B.** Immunohistochemical staining for Wnt signaling molecules in human liver specimen. Sample images from Human Protein Atlas website (<http://www.proteinatlas.org>)

**A.**

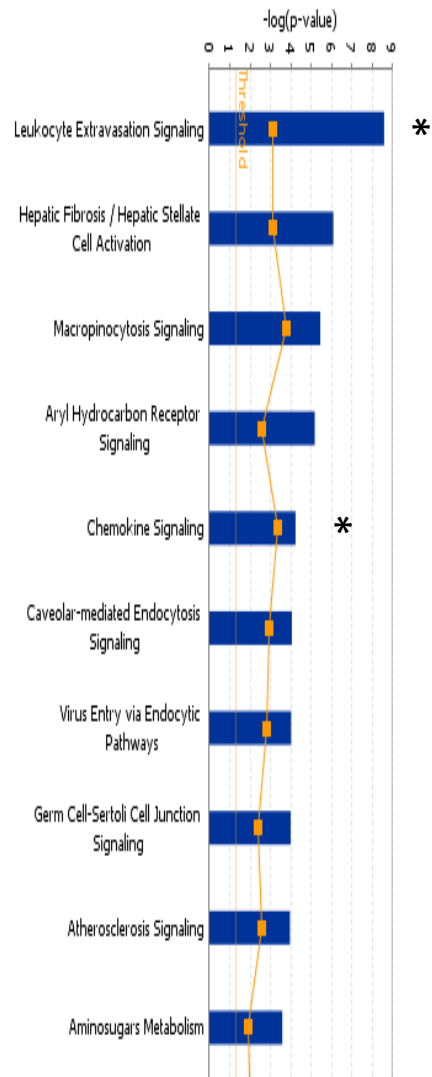

**B.**

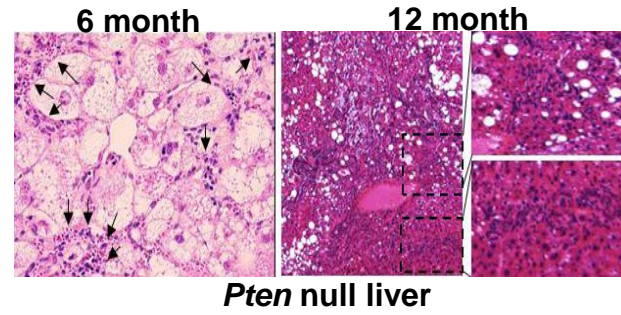

**C.**

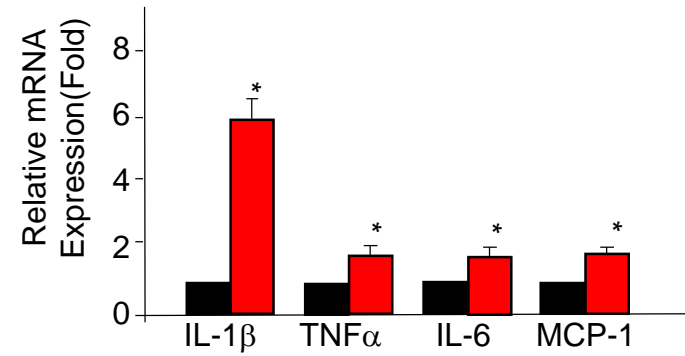

**D.**

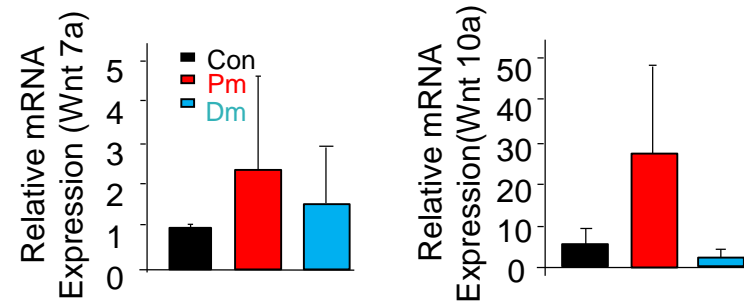

**E.**

**18 weeks WT NPCs subpopulation**

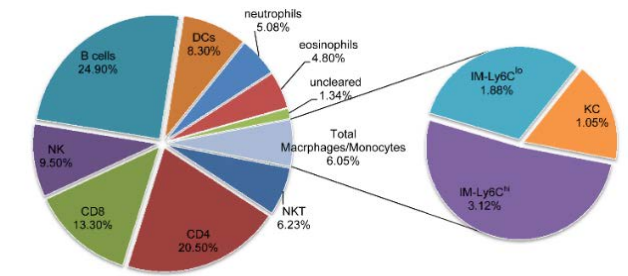

**18 weeks old PTEN<sup>-/-</sup> mouse NPCs subpopulation**

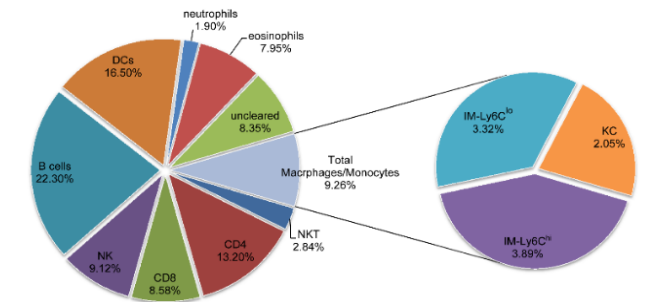

**45 weeks old PTEN<sup>-/-</sup> mouse NPCs subpopulation**

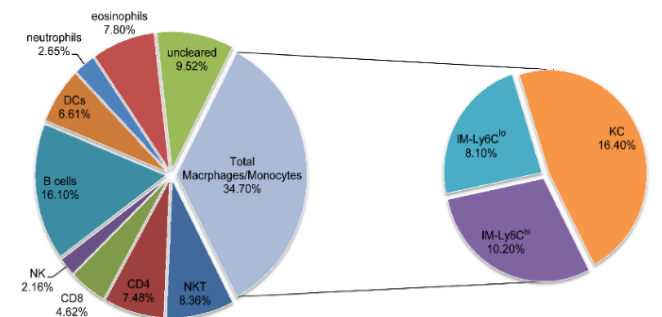



**Supplemental Figure 8. Accumulation of inflammatory cells may lead to production of Wnt.** **A.** Ingenuity Pathway Analysis of genes significantly over expressed in *Pten* null vs. control livers. Top 10 most significantly altered pathways shown. \*Pathways involved in the inflammatory process. **B.** Inflammatory cell infiltration is a common feature in *Pten* null induced fatty liver and liver cancer. **C.** Expression of cytokines in the *Pten* null vs. control livers. n=3. **D.** Isolated inflammatory cells from 5 months old *Pten* null liver produces Wnt 7a and 10a whereas *Akt2* deletion reduces their production. **E.** Flowcytometry analysis of immune cells in the CD45+ nonparenchymal cells isolated from the control (WT) and *Pten* null livers.

A.

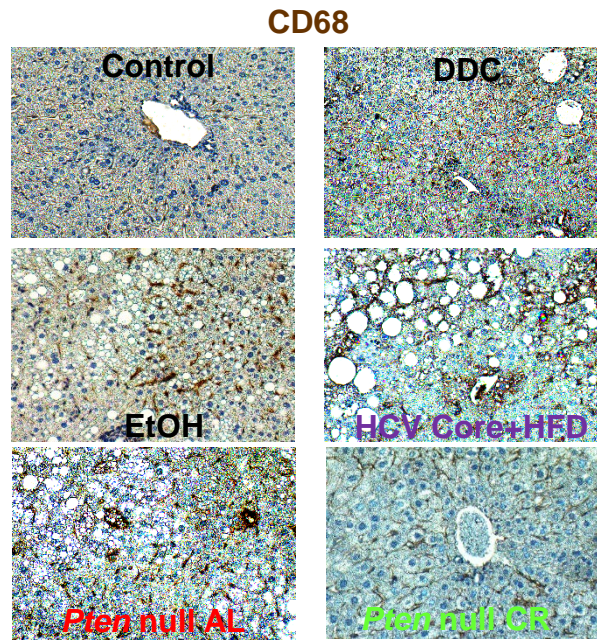

B.

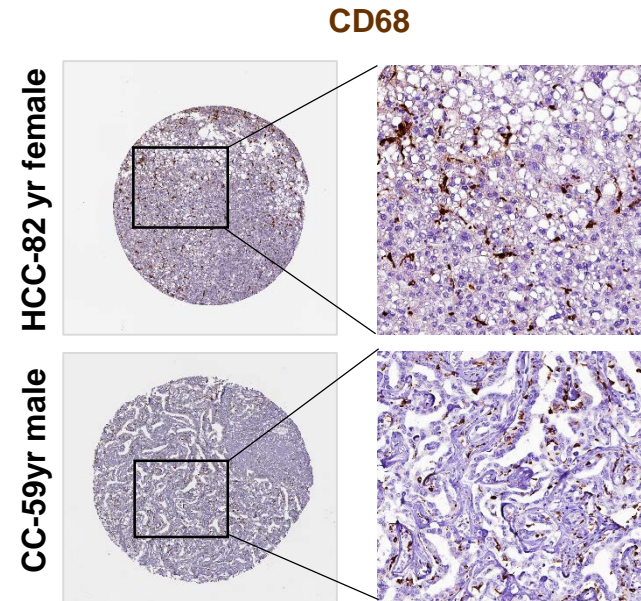

**Supplemental Figure 9. Macrophage (MO) accumulation is common in liver injury models and persist in cancers. A.** Macrophage accumulation in the various mouse models indicated as CD68 staining. DDC, liver injury induced by feeding of 0.05% DDC for 2 months. EtOH, liver injury induced by feeding alcohol. HCV+HFD, liver injury induced in HCV transgenic mice by feeding of high fat diet (HFD). **B.** human liver cancer specimens. Samples are human liver HCC (hepatocellular carcinoma) from a 82 year old female and CC (Cholangiocarcinoma) from a 59 year old male patient. CD68 stained images of human samples are sample images from Human Protein Atlas website (<http://www.proteinatlas.org>).

CD68+Keratin

Wild type

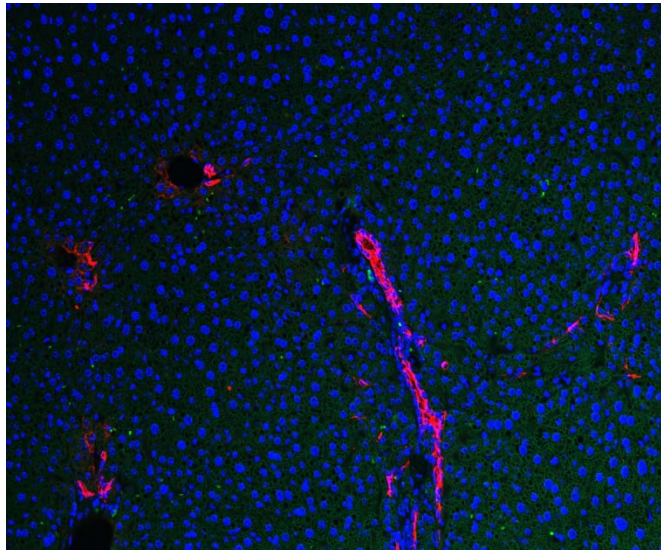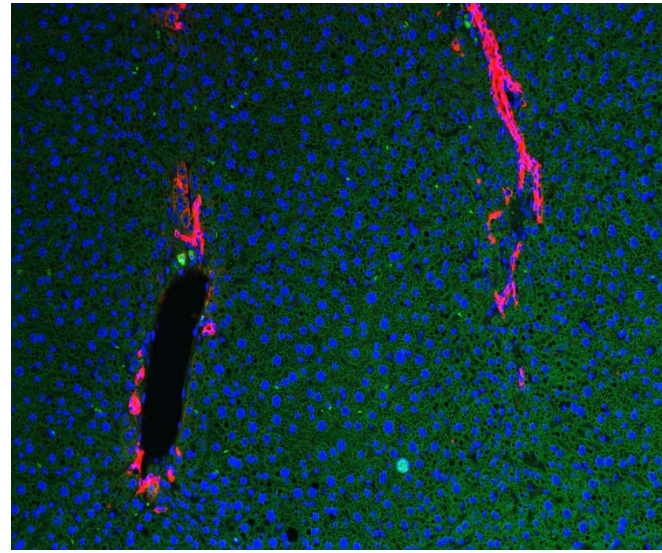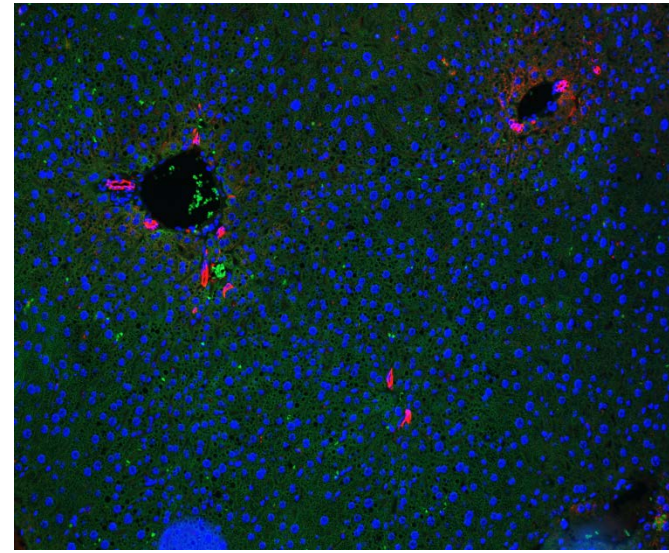

Pten null

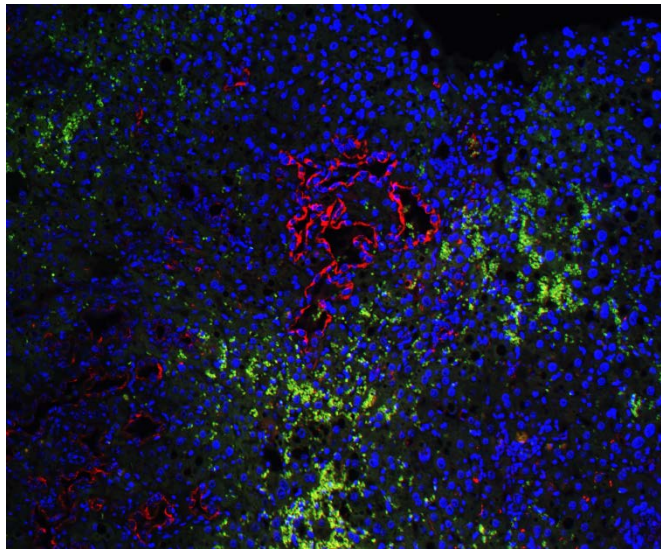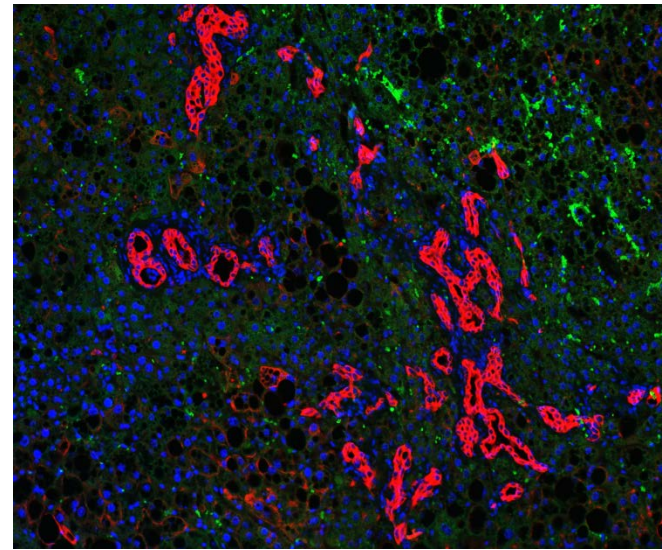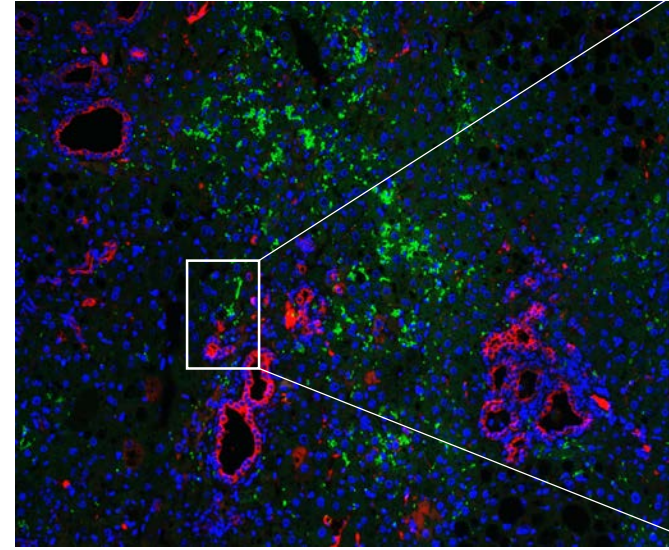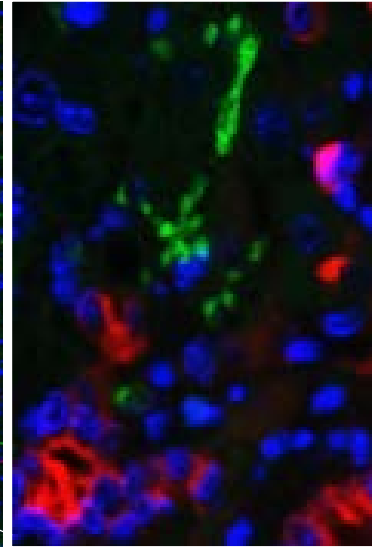

**Supplemental Figure 10. Localization of liver macrophage and ductal cell.** Macrophages stained with CD68 (green) are typically found at the periductal region that stains positive for keratin (red), particularly in the *Pten* null livers.

A.

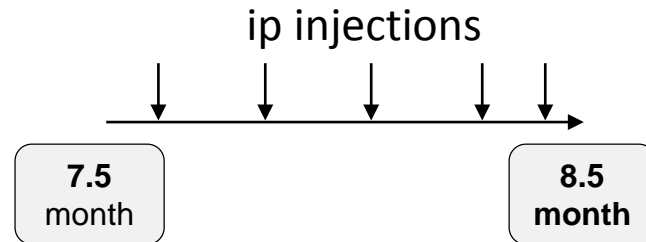

B.

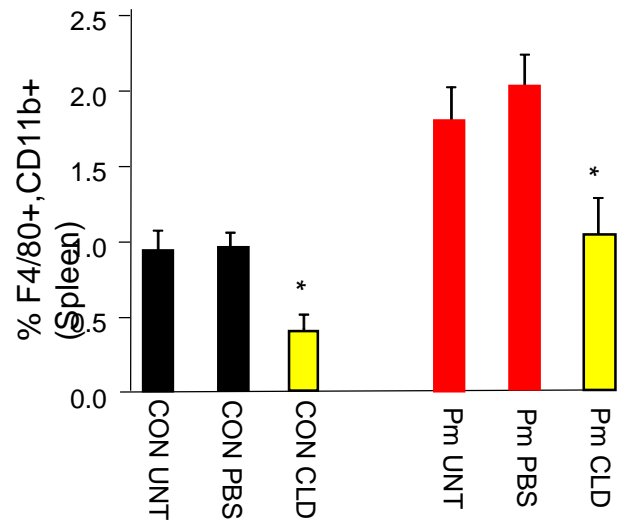

C.

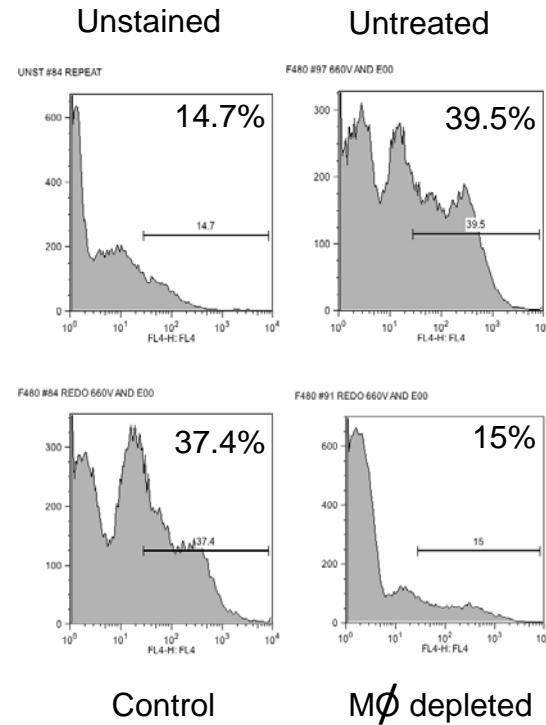

D.

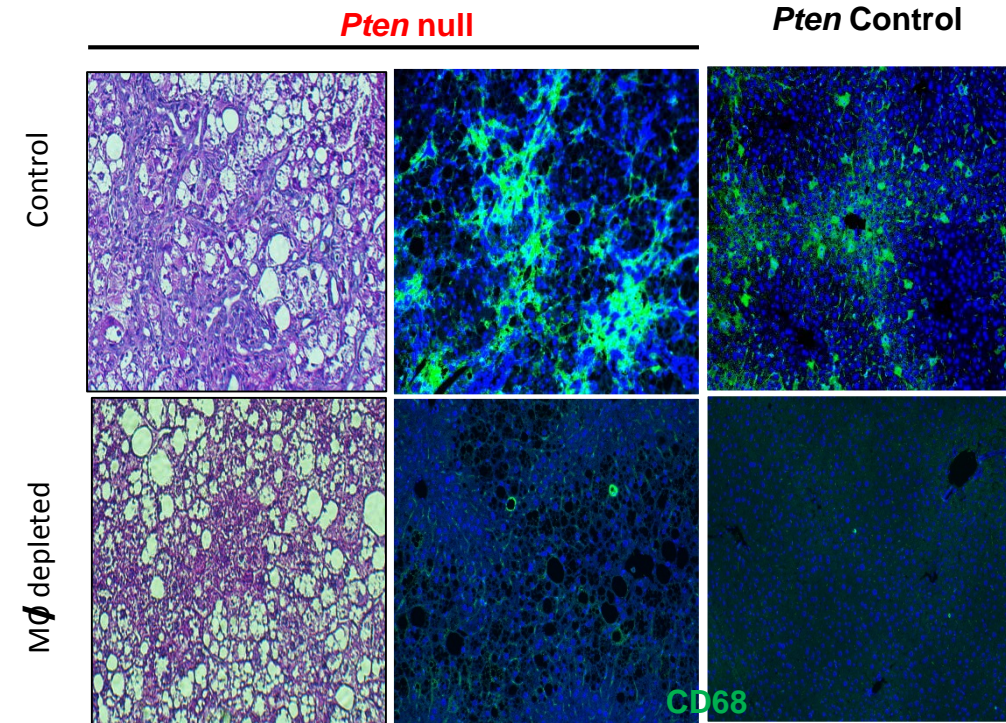

**Supplemental Figure 11. Macrophage (M $\phi$ ) accumulation is common in liver injury models and persist in cancers. A.** Liposome-Choldrolate or liposome-PBS injection protocol. **B.** Flowcytometry analysis of macrophages in the spleen.  $n=4-7$ . \*significantly different from control at  $P \leq 0.05$ . F4.80 and cd11b are used as markers to define macrophage populations. **C.** CD68 staining for macrophages in CLD or PBS treated livers. **D.** Flow cytometry sorting demonstrating depletion of macrophages.
